# Supplementary material
Source: PubMed Central journal article supplement (PMC3221274)
Supplement: dne0033-0130-s01.pdf [file dne0033-0130-s01.pdf]

**Table A.** Values of the mu-rhythm peak frequency for each subject below 1 year of age. The couples of subjects with equal age and mu rhythm peak frequency are highlighted in bold (subj. 19 and 20, subj. 24 and 25)

| Participants | Age (weeks) | Mu-peak desynchronization (Hz) |
|--------------|-------------|--------------------------------|
| 1            | 11          | 2.75                           |
| 2            | 11          | 3.5                            |
| 3            | 12          | 2.75                           |
| 4            | 12          | 3.25                           |
| 5            | 12          | 4.25                           |
| 6            | 14          | 4.25                           |
| 7            | 18          | 6                              |
| 8            | 20          | 4.5                            |
| 9            | 22          | 3.75                           |
| 10           | 23          | 4.5                            |
| 11           | 24          | 5.5                            |
| 12           | 24          | 5                              |
| 13           | 24          | 5.75                           |
| 14           | 24          | 6                              |
| 15           | 26          | 7.5                            |
| 16           | 28          | 6.25                           |
| 17           | 32          | 7.25                           |
| 18           | 34          | 8                              |
| <b>19</b>    | <b>36</b>   | <b>7.5</b>                     |
| <b>20</b>    | <b>36</b>   | <b>7.5</b>                     |
| 21           | 36          | 7.75                           |
| 22           | 46          | 7.75                           |
| 23           | 46          | 8.5                            |
| <b>24</b>    | <b>47</b>   | <b>8.25</b>                    |
| <b>25</b>    | <b>47</b>   | <b>8.25</b>                    |
